# Supplementary material
Source: Springer Nature journal article supplement (https://www.springermedizin.de/resource/supplementary/12885_2013_4438_MOESM3_ESM.pdf/9466272)
Supplement: MOESM3 [file 9466272]

# Multivariate Analysis

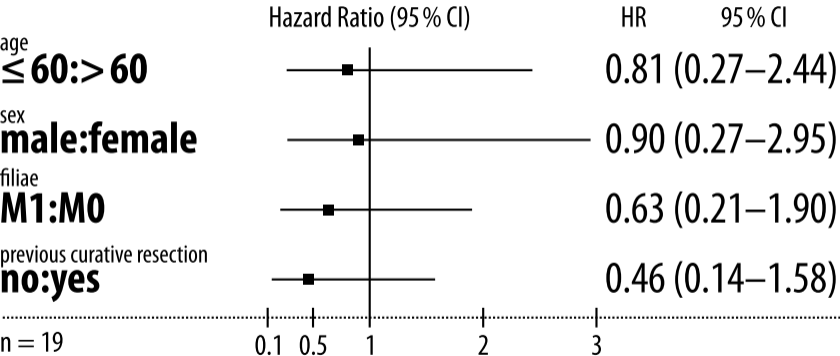

A hazard ratio below 1.0 indicates a favorable prognosis for the category mentioned last
